# Supplementary material
Source: PubMed Central journal article supplement (PMC5482268)
Supplement: NIHMS853211-supplement-Supplement_File.pdf [file NIHMS853211-supplement-Supplement_File.pdf]

## Supplementary Online Content

Kureshi F, Kennedy KF, Jones PG, et al. Association between cardiac rehabilitation participation and health status outcomes after acute myocardial infarction. *JAMA Cardiol.* Published online October 19, 2016. doi:10.1001/jamacardio.2016.3458

**eFigure 1.** Mean Short Form-12 (SF-12) Physical Component Summary (PCS) and Mental Component Summary (MCS) Scores of Cardiac Rehabilitation Participants (n=2015) and Nonparticipants (n=2914) During 12 Months After Acute Myocardial Infarction

**eFigure 2.** Propensity Scatter Plot Used for Matching Cardiac Rehabilitation Participants and Nonparticipants

**eFigure 3.** Standardized Differences of Patient Covariates Before and After Propensity Matching

**eFigure 1.** Mean Short Form-12 (SF-12) Physical Component Summary (PCS) and Mental Component Summary (MCS) Scores of Cardiac Rehabilitation Participants (n=2015) and Nonparticipants (n=2914) During 12 Months After Acute Myocardial Infarction

**A. SF-12 PCS Score**

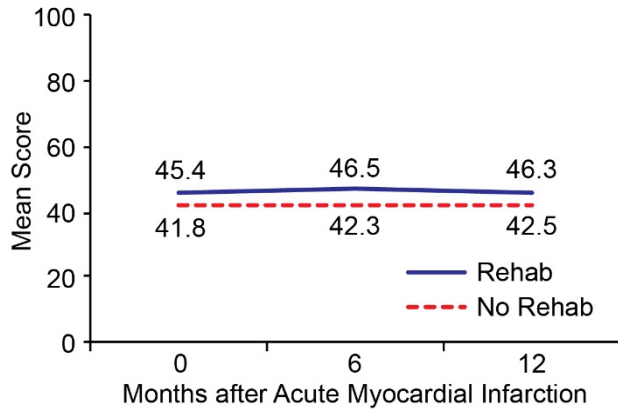

**B. SF-12 MCS Score**

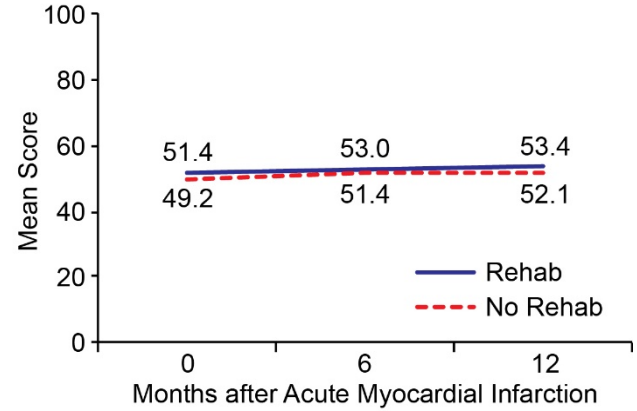

**eFigure 2.** Propensity Scatter Plot Used for Matching Cardiac Rehabilitation Participants and Nonparticipants

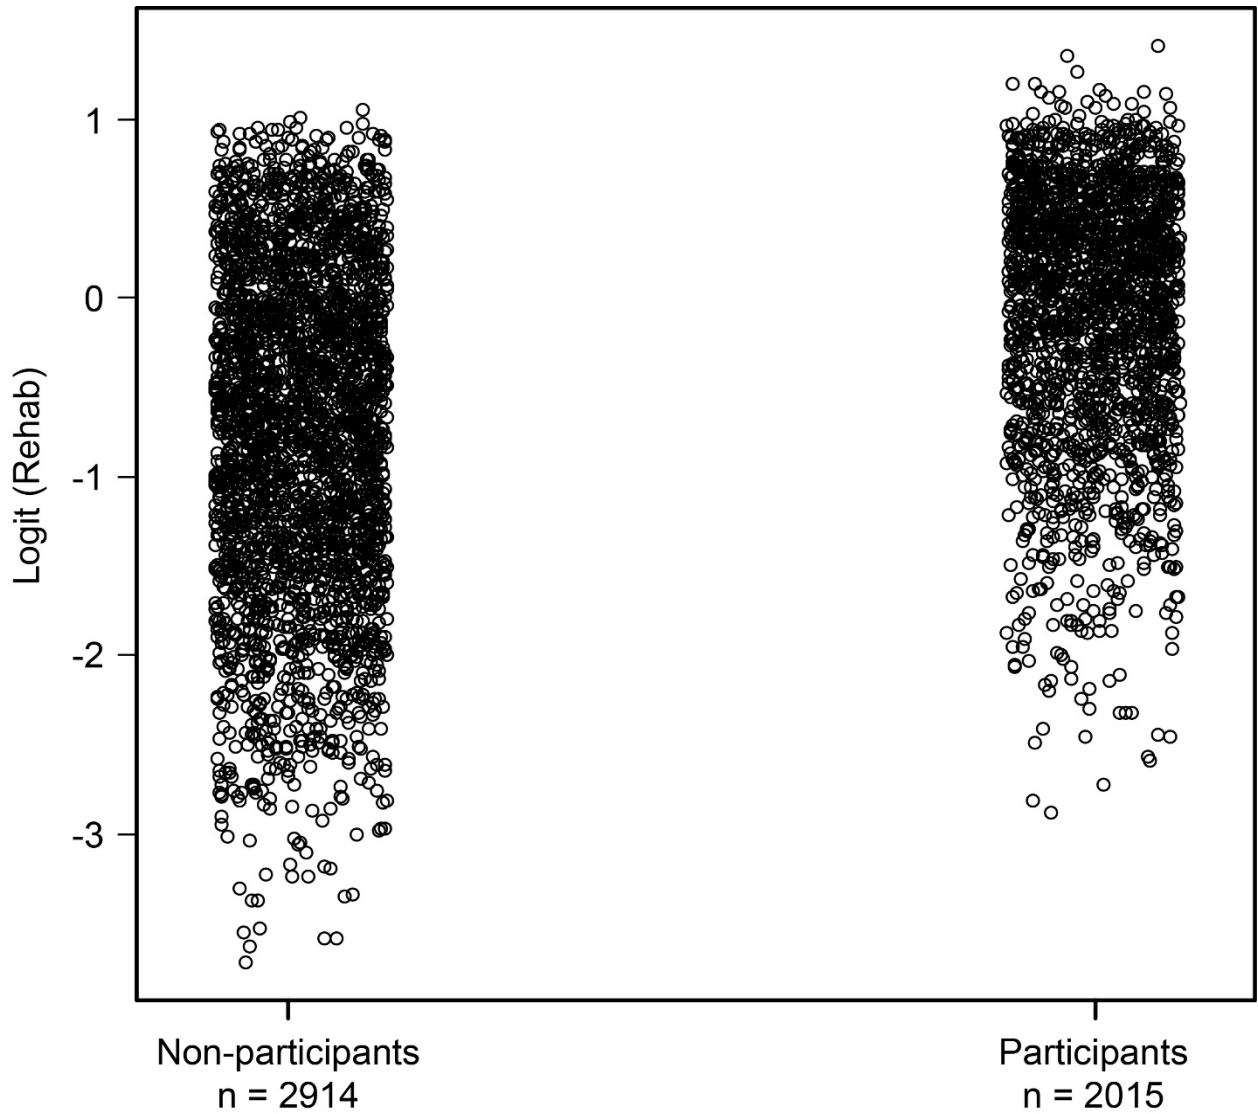

Logit (Rehab) on the y-axis indicates the logit of patient propensity score for the likelihood of participating in Cardiac rehabilitation based on observed covariates.

**eFigure 3. Standardized Differences of Patient Covariates Before and After Propensity Matching**

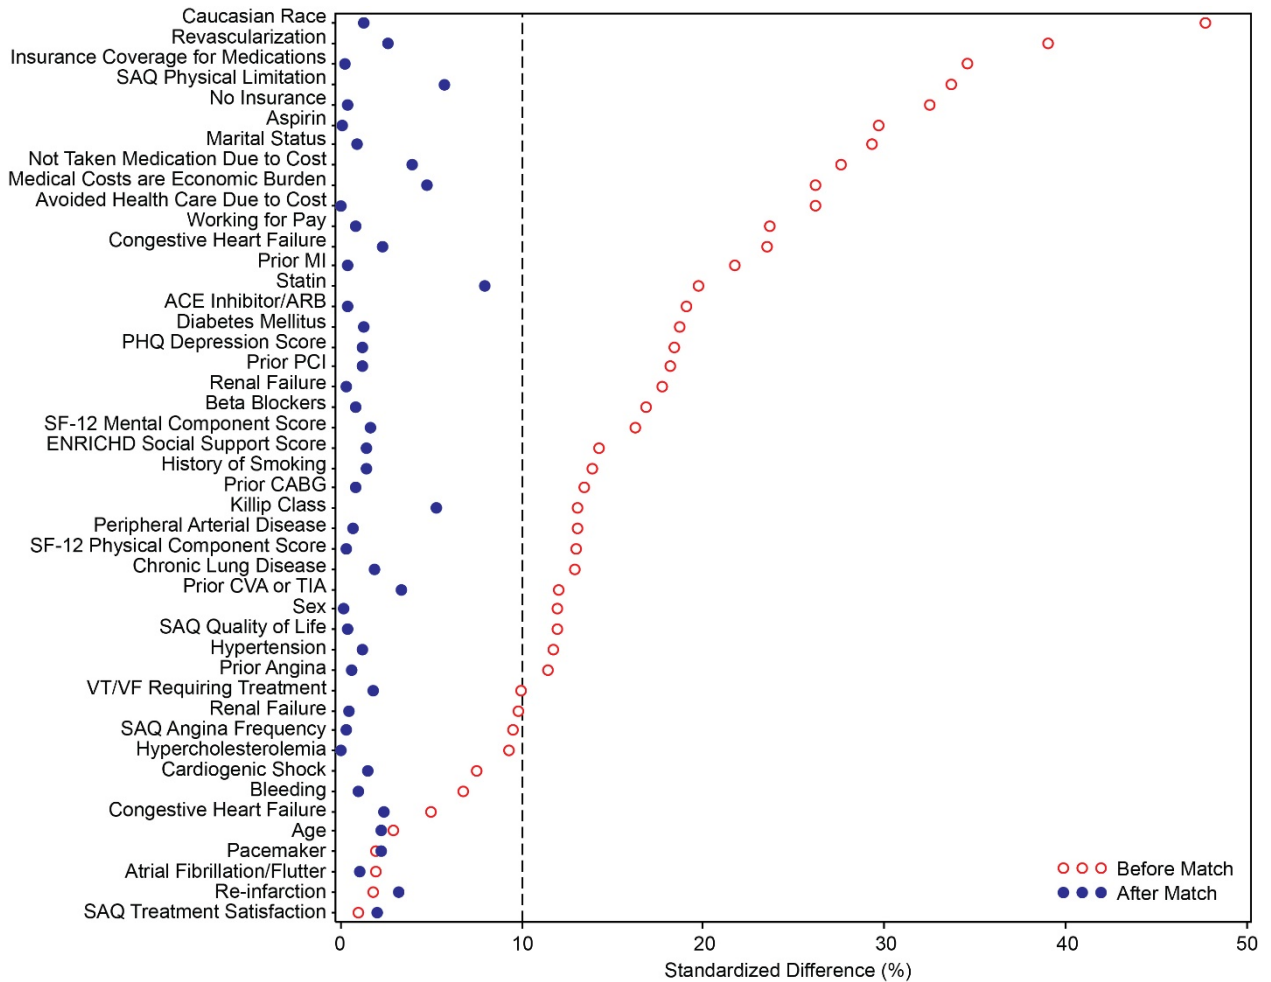

\*A Standardized Difference >10% for a patient characteristic is generally accepted to denote inadequate balance between groups

PHQ, Patient Health Questionnaire; ENRICHD, Enhancing Recovery in Coronary Heart Disease; CABG, Coronary Artery Bypass Grafting; MI, Myocardial Infarction; PCI, Percutaneous Coronary Intervention; CVA, Cerebrovascular accident; TIA, Transient Ischemic Attack; VT, Ventricular Tachycardia; VF, Ventricular Fibrillation; SAQ, Seattle Angina Questionnaire; SF-12, Short Form 12; ACE, Angiotensin Converting Enzyme; ARB, Angiotensin Receptor Blocker
